# Supplementary material for: TPC2 Proteins Mediate Nicotinic Acid Adenine Dinucleotide Phosphate (NAADP)- and Agonist-evoked Contractions of Smooth Muscle
Source: PubMed Central journal article supplement — J Biol Chem. 2010 Jun 14;285(32):24925–32. doi: 10.1074/jbc.M110.129833 (PMC2915728; doi:10.1074/jbc.m110.129833), 2010-06-14
Supplement: supp_M110.129833_jbc.M110.129833-1.pdf [file supp_M110.129833_jbc.M110.129833-1.pdf]

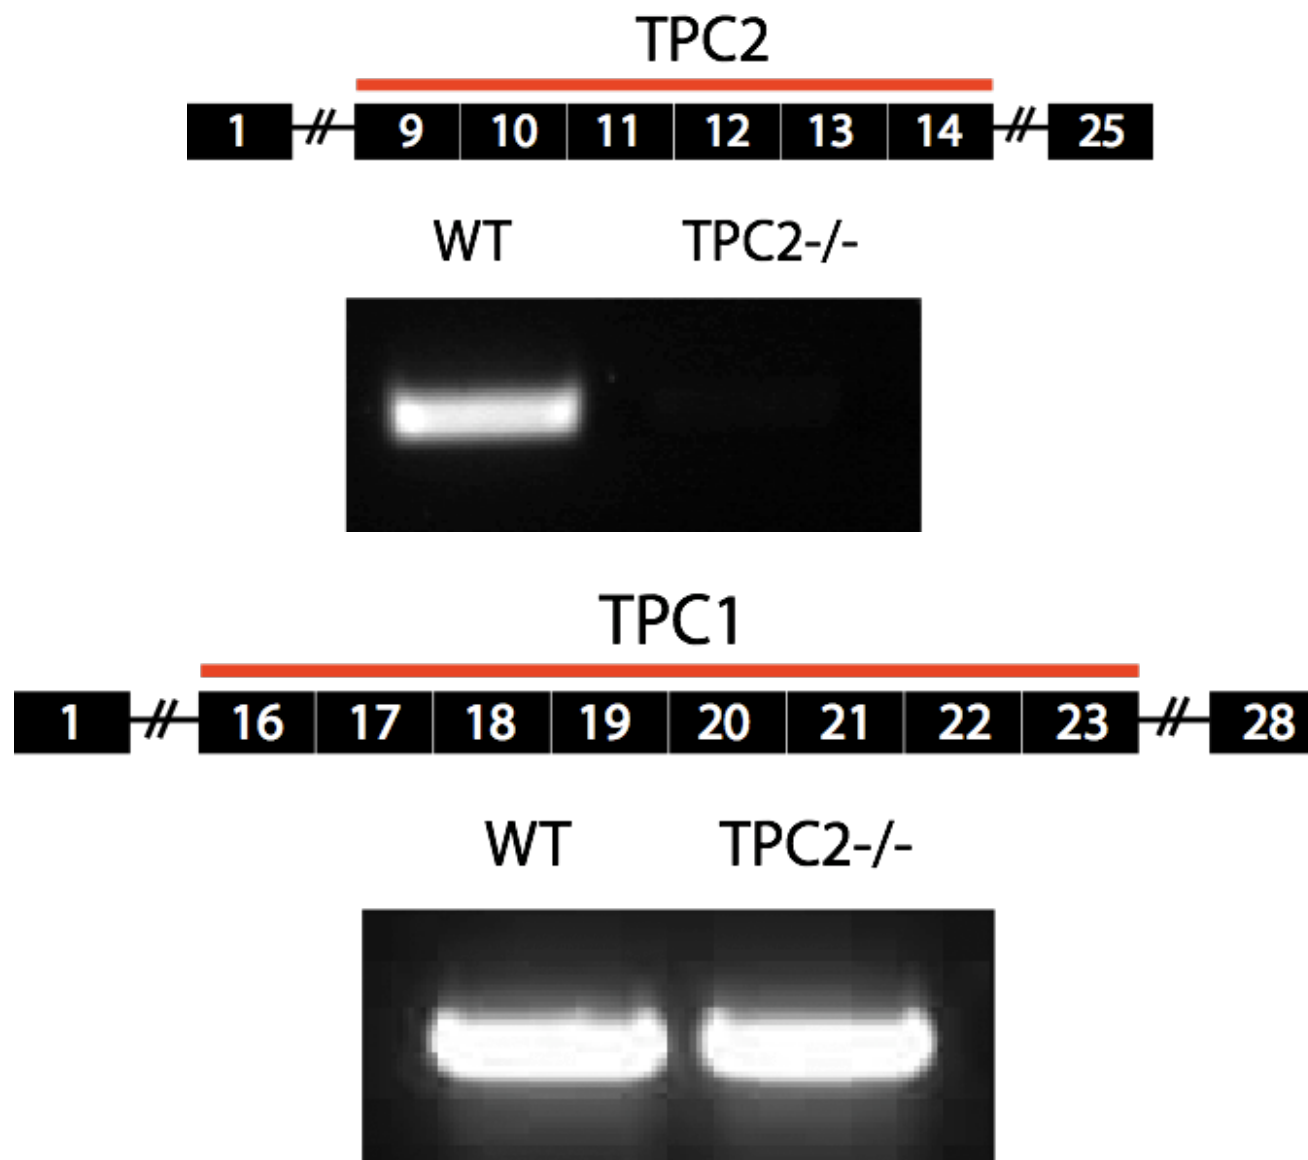

Supplementary Fig 1.

**Table 1**

|                               | <b>Taenia caecum</b> |              | <b>Bladder</b> |              |
|-------------------------------|----------------------|--------------|----------------|--------------|
|                               | <b>Control</b>       | <b>T + R</b> | <b>Control</b> | <b>T + R</b> |
| <b>IP<sub>3</sub> (50 μM)</b> | 8.4 ± 1.2            | 0*           | 12.0 ± 1.7     | 0*           |
| <b>cADPR (50 μM)</b>          | 2.7 ± 0.4            | 0*           | 9.0 ± 1.78     | 0*           |
| <b>NAADP (1 μM)</b>           | 3.9 ± 0.8            | 3.5 ± 0.1    | 2.5 ± 0.5      | 1.9 ± 0.3    |

\* $P < 0.05$ , compared to its control response, n=3-13

**Table 2**

|                       | <b>Taenia caecum</b> |                     | <b>Bladder</b>      |                     |
|-----------------------|----------------------|---------------------|---------------------|---------------------|
|                       | <b>NAADP (1 μM)</b>  | <b>NAADP (2 μM)</b> | <b>NAADP (1 μM)</b> | <b>NAADP (2 μM)</b> |
| <b>Control</b>        | 3.9 ± 0.7            | 5.9 ± 0.8           | 2.5 ± 0.4           | 1.8 ± 0.5           |
| <b>NAADP (100 μM)</b> | 0*                   | 0.03 ± 0.01*        | 0.04 ± 0.02 *       | 0.2 ± 0.04 *        |
| <b>Baf (1 μM)</b>     | 0*                   | 0*                  | 0.2 ± 0.05 *        | 0*                  |

\* $P < 0.05$ , compared to its control response, n=4-12

## SUPPLEMENTARY DATA

### Supplementary Fig. 1

**Mouse detrusor muscle express both TPC1 and TPC2 channels.** RT-PCR demonstrates the TPC expression profiles in wild-type and *Tpcn2*<sup>-/-</sup> mice. TPC1 is present in both wild-type and *Tpcn2*<sup>-/-</sup> mice. TPC2 is present in wild-type but absent in *Tpcn2*<sup>-/-</sup> mice. The numbers indicate the number of exon in the gene and the red bars indicate the region amplified in RT-PCR.

### Table 1

#### **Summary of messenger-evoked contractions in guinea pig taenia caecum and bladder muscle strips**

IP<sub>3</sub> (50 μM), cADPR (50 μM) and NAADP (1 μM) contractions in the absence (control) and presence of thapsigargin (T; 5 μM) + ryanodine (R; 100 μM) in taenia caecum and in bladder.

### Table 2

#### **Summary of NAADP-evoked contractions in guinea pig taenia caecum and bladder muscle strips**

The effects of NAADP (N, 100 μM) and bafilomycin (B, 100 nM) on NAADP induced control (C) contraction responses in taenia caecum and in bladder.
